# Supplementary material for: A biocompatible open system Na-doped IrOx(OH)y energy storage device with enhanced charge storage properties and long lifetime
Source: Royal Society of Chemistry journal article supplement (doi:10.1039/d2ta03603g), 2022-01-01
Supplement: d2ta03603g1.pdf [file d2ta03603g1.pdf]

## Supporting Information

### **A biocompatible open system Na-doped $\text{IrO}_x(\text{OH})_y$ energy storage device with enhanced charge storage properties and long lifetime**

*Yi-Chieh Hsieh, Chun-Han (Matt) Lai, Kuang-Chih Tso, Shih-Cheng Chou, Grace J. Whang, Christopher S. Choi, Wai-Hong Cheang, Chao-Yi Chu, Jyh-Fu Lee, Po-Chun Chen, San-Yuan Chen, Bruce S. Dunn\*, Pu-Wei Wu\**

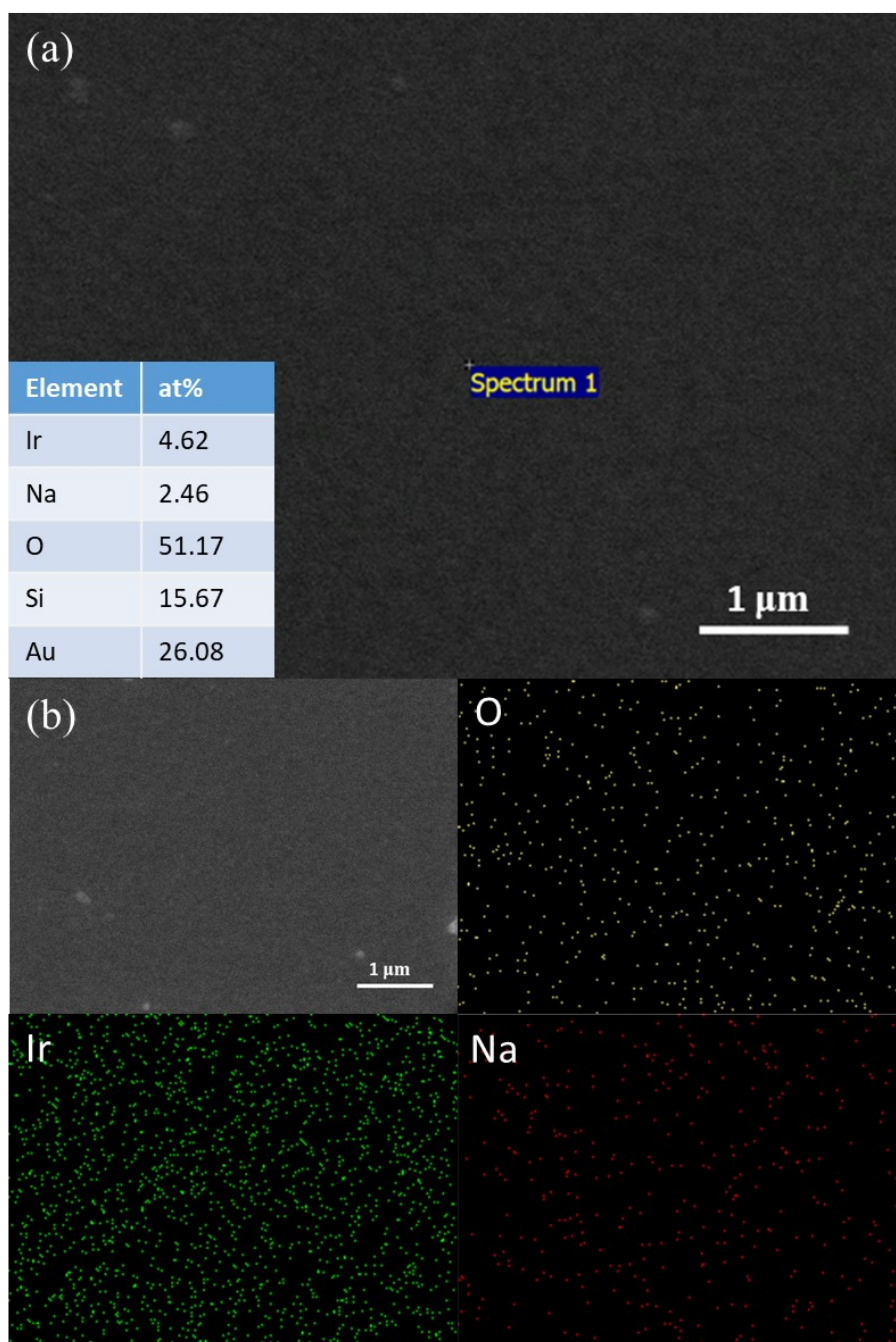

**Figure S1.** (a) EDX spectra of  $\text{Na-IrO}_x(\text{OH})_y$  and (b) mapping results corresponding to the selected region from the top-view SEM image.

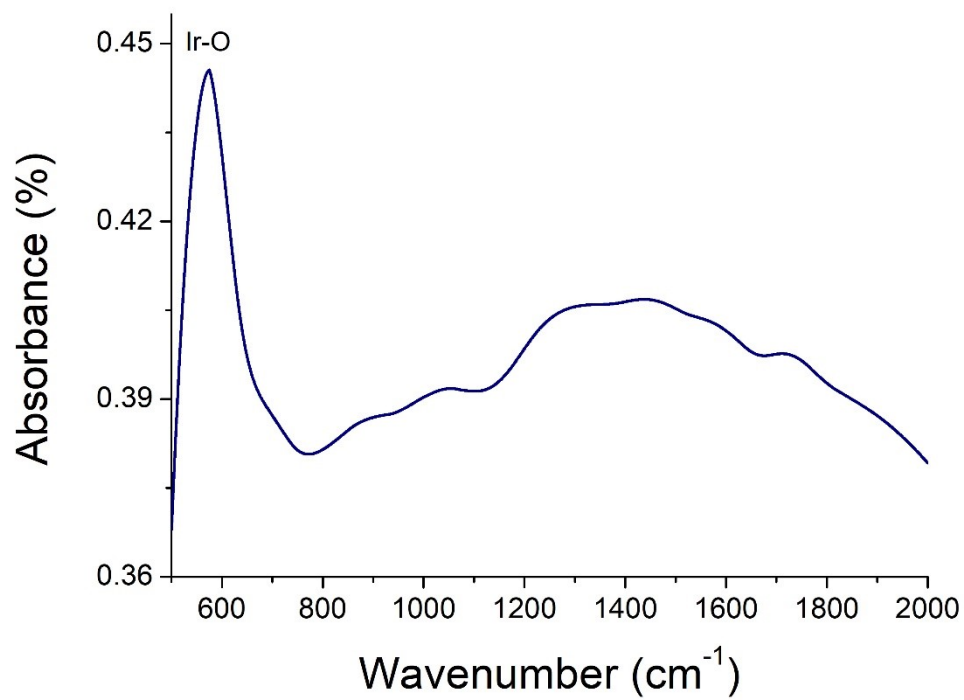

**Figure S2.** FT-IR analysis of Na-IrO<sub>x</sub>(OH)<sub>y</sub> after annealing at 550°C for 2 h.

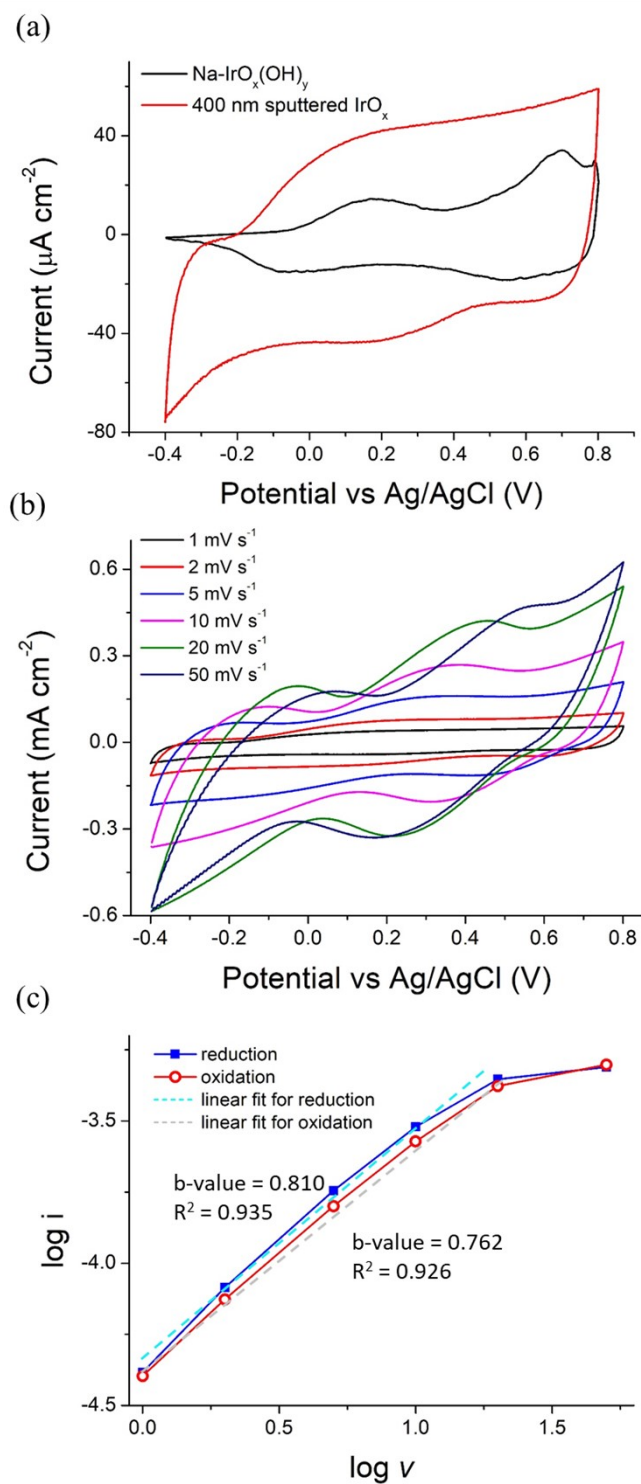

**Figure S3.** (a) CV profile of Na-IrO<sub>x</sub>(OH)<sub>y</sub> and 400 nm sputtered IrO<sub>x</sub> with a scan rate of 1 mV s<sup>-1</sup> in PBS. (b) CV profiles of sputtered IrO<sub>x</sub> at different scan rates in PBS. (c) The log ν-log i correlation derived from the reduction and oxidation peaks of sputtered IrO<sub>x</sub>.

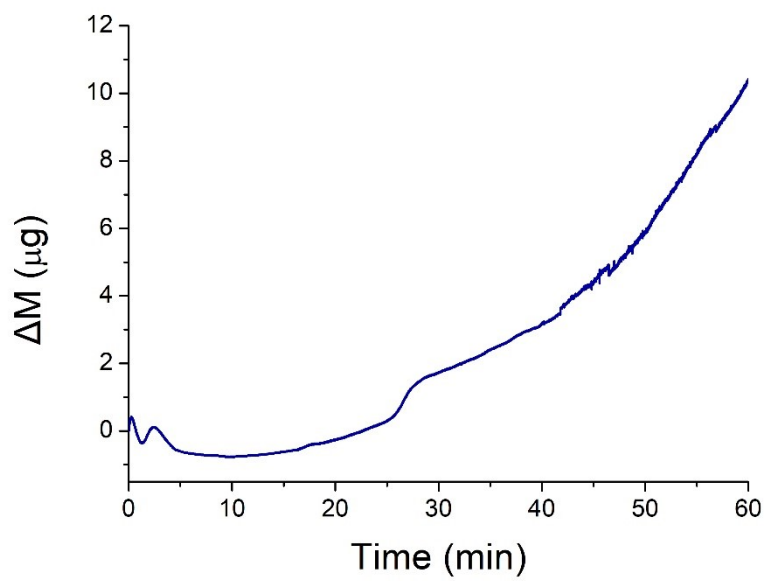

**Figure S4.** Variation in mass from eQCM during wet chemical deposition of  $\text{Na-IrO}_x(\text{OH})_y$ .

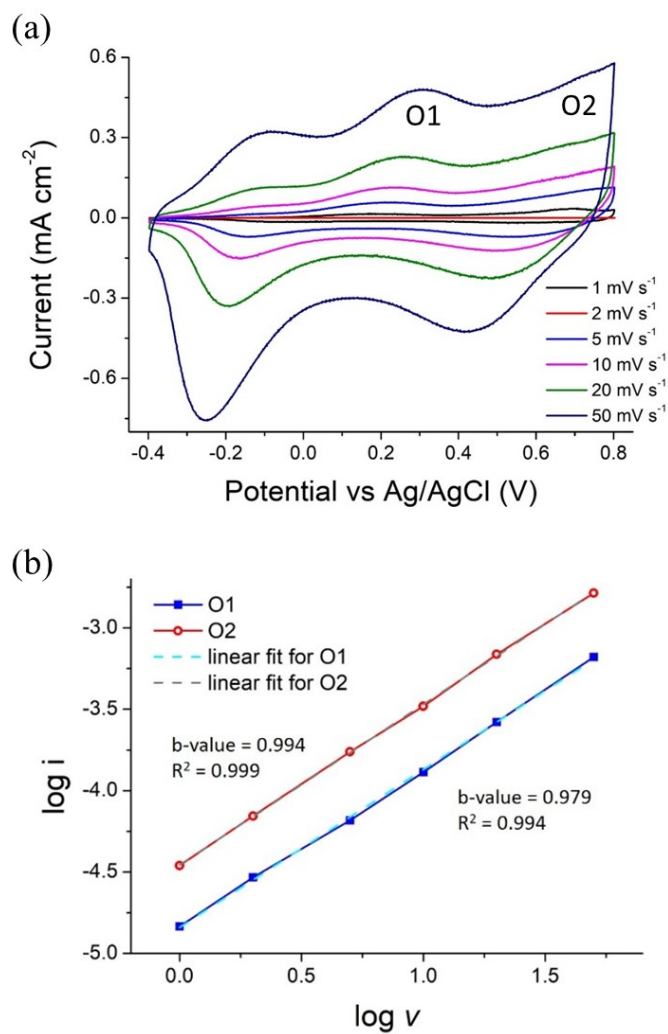

**Figure S5.** (a) CV profiles of Na-IrO<sub>x</sub>(OH)<sub>y</sub> at different scan rates in PBS. (b) The log v-log i correlation derived from the oxidation peaks as marked as O1 and O2 in Figure 2a.

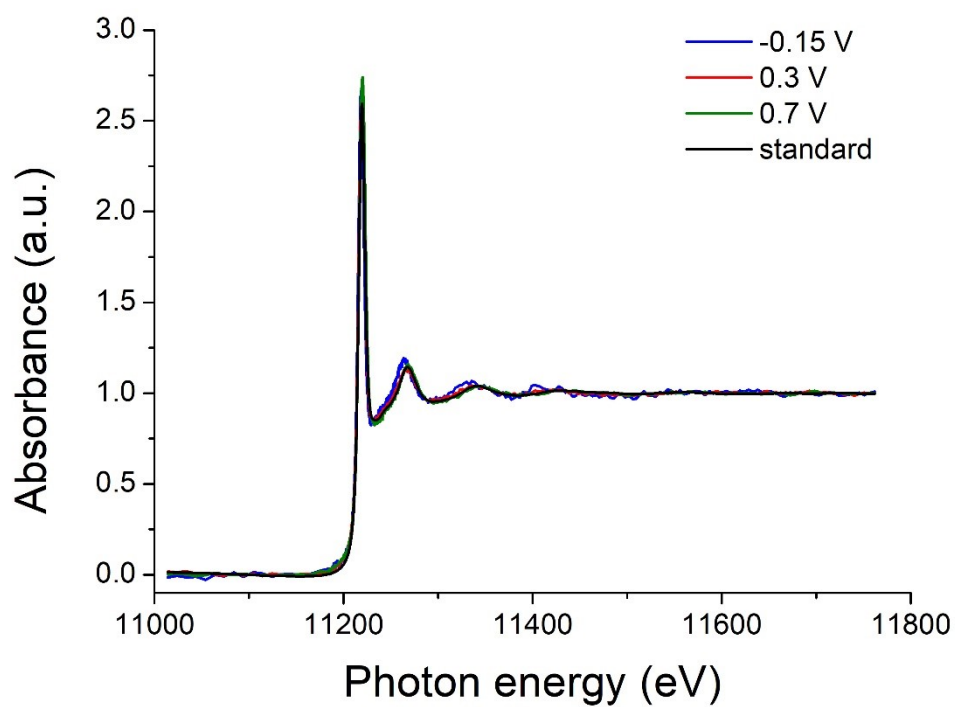

**Figure S6.** Ir L<sub>III</sub>-edge spectra of Na-IrO<sub>x</sub>(OH)<sub>y</sub> held at different potentials and commercial IrO<sub>2</sub>·H<sub>2</sub>O powder as the standard.

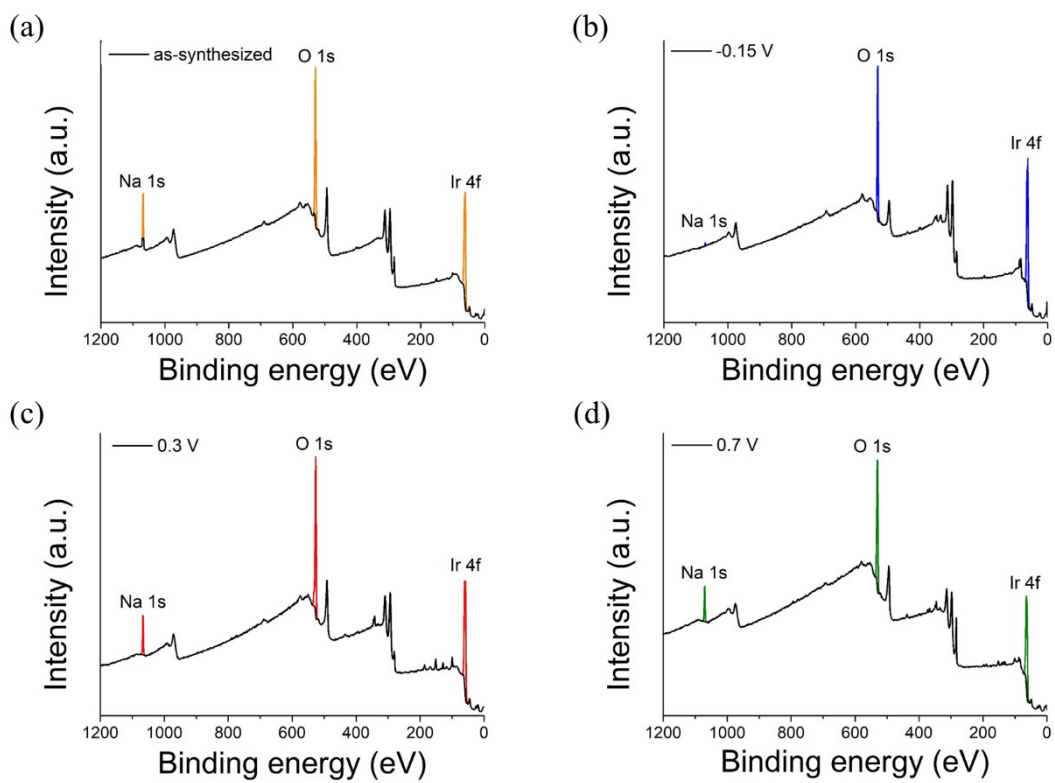

**Figure S7.** Survey scan of Na-IrO<sub>x</sub>(OH)<sub>y</sub>; (a) as-synthesized as well as at (b) -0.15, (c) 0.3, and (d) 0.7 V.



**Table S1.** Atomic percentage of Ir, Na, and O derived from the survey scan of Na-IrO<sub>x</sub>(OH)<sub>y</sub> in Figure S6.

|                | Ir (at%) | Na (at%) | O (at%) |
|----------------|----------|----------|---------|
| as-synthesized | 15.31    | 7.22     | 77.47   |
| -0.15 V        | 19.97    | 0.57     | 79.46   |
| 0.3 V          | 15.14    | 7.32     | 77.54   |
| 0.7 V          | 15.00    | 7.30     | 77.70   |

From the fitting results, the chemical composition of the as-synthesized Na-IrO<sub>x</sub>(OH)<sub>y</sub> sample can be found as Na<sub>0.47</sub>IrO<sub>1.52</sub>(OH)<sub>1.82</sub>.

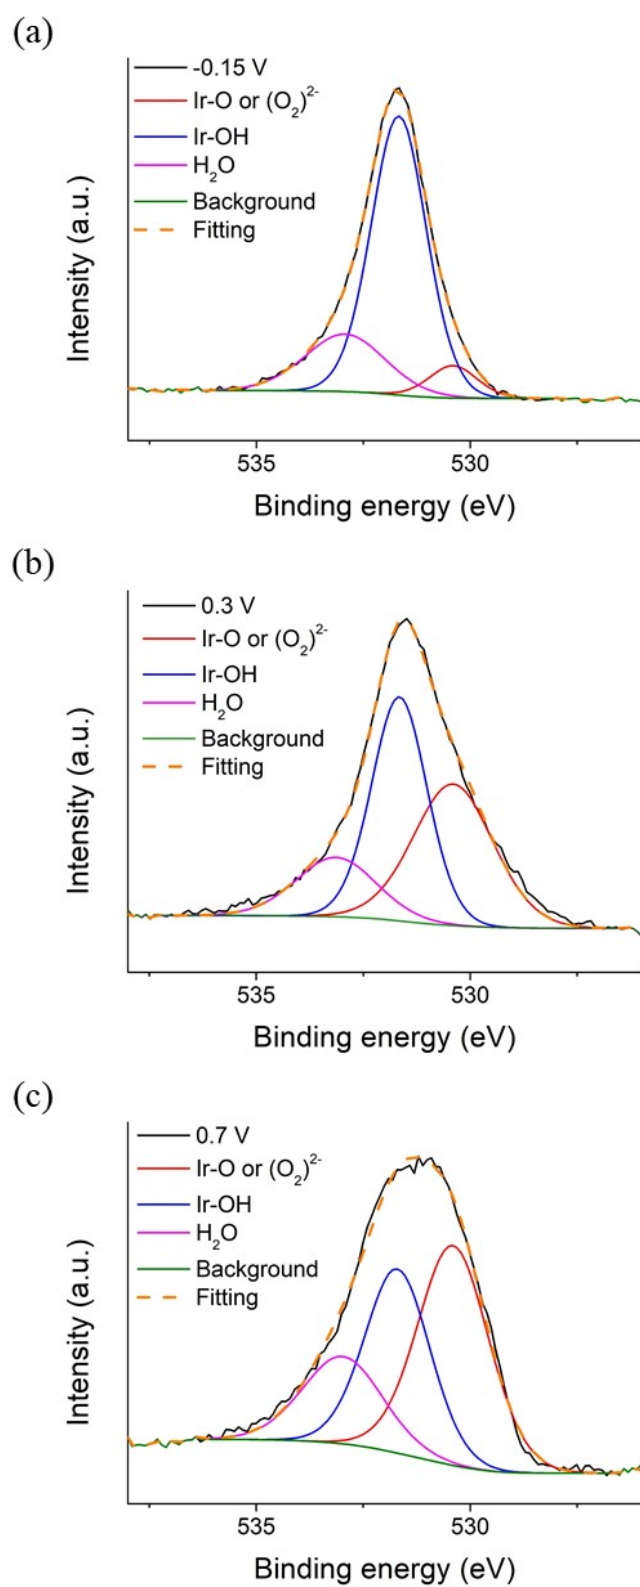

**Figure S8.** Oxygen stoichiometry determination. The photoemission profile and its fitting curves for O 1s spectrum of Na-IrO<sub>x</sub>(OH)<sub>y</sub> at (a) -0.15, (b) 0.3, and (c) 0.7 V.

The XAS and XPS results from Figure 3 suggest that the individual redox reactions for proton and sodium occurring in the Na-IrO<sub>x</sub>(OH)<sub>y</sub> thin film can be written as follows:

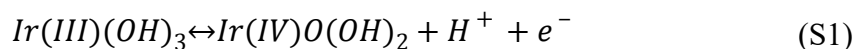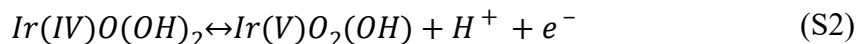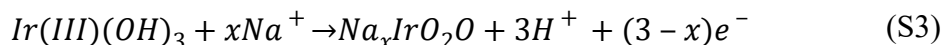

It had been our interest to determine the presence of (O<sub>2</sub>)<sup>2-</sup> from equation (4) at different potentials to obtain full picture of the overall role played by of Na ions. As shown in Figure 3d and S7, we could obtain the O 1s spectrum from different samples. The O 1s spectrum could be fitted by Ir-OH, H<sub>2</sub>O, Ir-O, and (O<sub>2</sub>)<sup>2-</sup> peaks.<sup>R1</sup> While the Ir-OH and H<sub>2</sub>O peaks could be easily determined, the Ir-O (530.4 eV) and (O<sub>2</sub>)<sup>2-</sup> (530.5 eV) peaks are difficult to be distinguished due to their close proximity. The decrease of Ir-O and (O<sub>2</sub>)<sup>2-</sup> peaks at -0.15 V was obvious from Figure S7, however, the composition of (O<sub>2</sub>)<sup>2-</sup> was unable to be obtained. Hence, the exact value for x in equation 4 was not determined.

- R1. V. Pfeifer, T. E. Jones, J. J. Velasco Vélez, C. Massué, R. Arrigo, D. Teschner, F. Girgsdies, M. Scherzer, M. T. Greiner, J. Allan, M. Hashagen, G. Weinberg, S. Piccinin, M. Hävecker, A. Knop-Gericke, and R. Schlögl, *Surf. Interface Anal.*, 2016, **48**, 261-273.
- R2. D. Foix, M. Sathiya, E. McCalla, J.-M. Tarascon, and D. Gonbeau, *J. Phys. Chem. C*, 2016, **120**, 862-874.

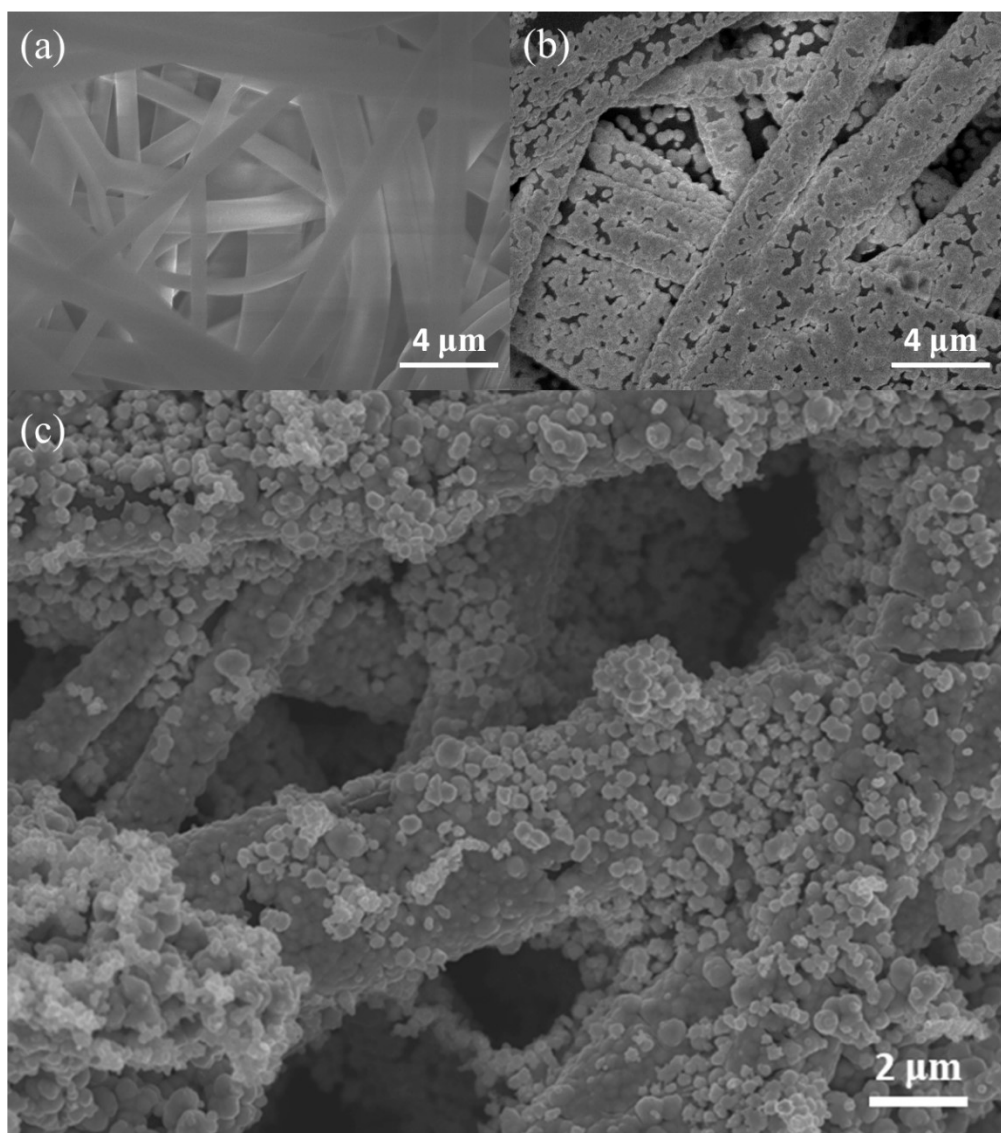

**Figure S9.** SEM image of (a) PPMM, (b) Au-PPMM, and (c) Na-IrO<sub>x</sub>(OH)<sub>y</sub>-Au-PPMM.

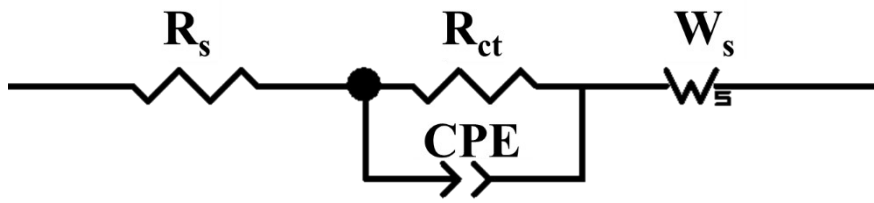

**Figure S10.** Equivalent circuit model for impedance fitting.

**Table SII.** Full cell fitting results in L929 solution and PBS.

|               | $R_s$ ( $\Omega\text{-cm}^2$ ) | $R_{ct}$ ( $\Omega\text{-cm}^2$ ) |
|---------------|--------------------------------|-----------------------------------|
| L929 solution | 20                             | 4.3                               |
| PBS           | 17                             | 5.2                               |

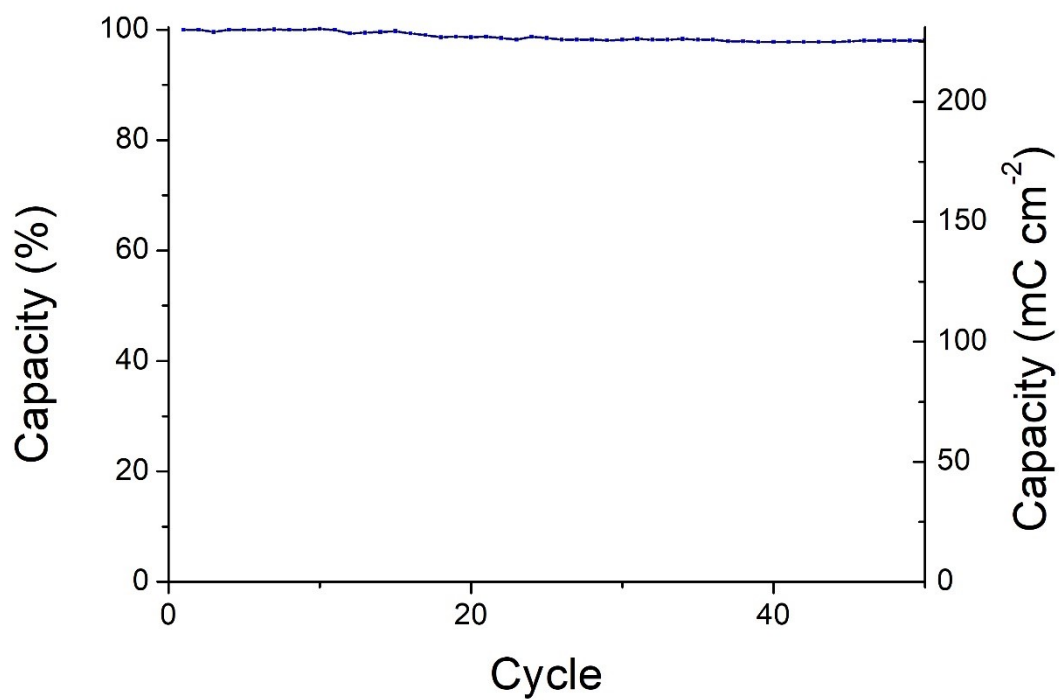

**Figure S11.** Stability test of Na-IrO<sub>x</sub>(OH)<sub>y</sub> full cell using GCD at 100 μA cm<sup>-2</sup> in PBS.

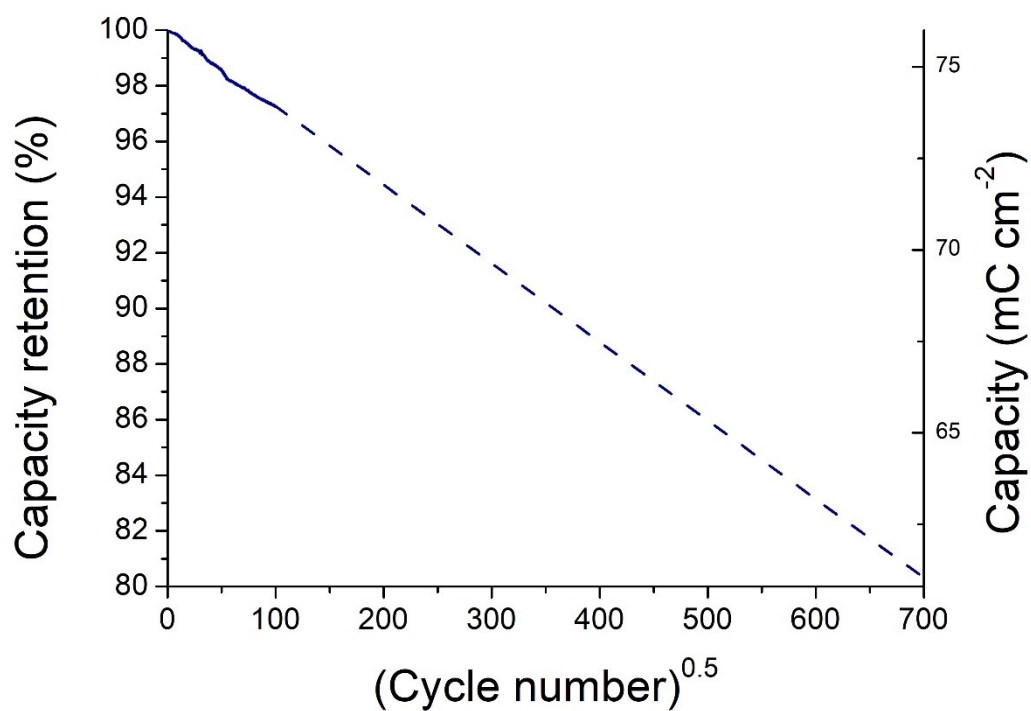

**Figure S12.** Stability test of Na-IrO<sub>x</sub>(OH)<sub>y</sub> full cell using CV at 50 mV s<sup>-1</sup> in PBS.

The capacity retention decreased linearly with increasing square root of the cycle number in the first 10,000 cycle and can be anticipated to reach 80% after near 500k cycles.



**Table III.** Comparisons of different open system supercapacitors in the literature.

| Material                      | Energy density                                | Power density                               | Capacity retention         | Ref  |
|-------------------------------|-----------------------------------------------|---------------------------------------------|----------------------------|------|
| <b>This work</b>              | <b>6.61 <math>\mu\text{Wh cm}^{-2}</math></b> | <b>850 <math>\mu\text{W cm}^{-2}</math></b> | <b>97% / 10,000 cycles</b> |      |
| ZnO                           | 0.153 $\mu\text{Wh cm}^{-2}$                  | 27 $\mu\text{W cm}^{-2}$                    | 70% / 1,000 cycles         | [39] |
| PEDOT:PSS/ferritin/MWNT fiber | 0.82 $\mu\text{Wh cm}^{-2}$                   | 150 $\mu\text{W cm}^{-2}$                   | 98% / 1,000 cycles         | [13] |
| MnO <sub>2</sub> /MWCNT       | 5 Wh kg <sup>-1</sup>                         | 3,000 W kg <sup>-1</sup>                    | 60% / 5,000 cycles         | [16] |
| carbon nanotube fiber         | 3.18 $\mu\text{Wh cm}^{-2}$                   | 1.04 mW cm <sup>-2</sup>                    | 98% / 10,000 cycles        | [14] |
| GO and myoglobin              | 1.1 Wh kg <sup>-1</sup>                       | 116 W kg <sup>-1</sup>                      | 98% / 5,000 cycles         | [11] |
| melanin/carbon black          | 0.122 $\mu\text{Wh cm}^{-2}$                  | 5.24 mW cm <sup>-2</sup>                    | 61% / 20,000 cycles        | [15] |

**Table SIV.** Comparison of total usable energy with implantable energy storage devices in the literature.

|                                        | Capacity<br>(mAh cm <sup>-3</sup> ) | Nominal<br>Voltage (V) | Cycle Life    | Usable<br>Energy<br>(mWh cm <sup>-3</sup> ) | Ref  |
|----------------------------------------|-------------------------------------|------------------------|---------------|---------------------------------------------|------|
| <b>Close System Devices</b>            |                                     |                        |               |                                             |      |
| Li primary battery                     | 280                                 | 3.3                    | -             | 924                                         | [49] |
| Li-ion thin film battery               | 200                                 | 3.6                    | 1,000         | 720,000                                     | [50] |
| primary battery (Zn-Ag <sub>2</sub> O) | 500                                 | 1.6                    | -             | 800                                         | [51] |
| <b>Open System Devices</b>             |                                     |                        |               |                                             |      |
| biogalvanic cell                       | 270                                 | 0.3                    | -             | 81                                          | [40] |
| bio-fuel cell                          | 930                                 | 0.32                   | -             | 298                                         | [52] |
|                                        | 3                                   | 0.5                    | 5,000         | 7,500                                       | [11] |
|                                        | 1                                   | 0.4                    | 1,000         | 4,000                                       | [13] |
| supercapacitor                         | 0.45                                | 0.25                   | 10,000        | 1,125                                       | [R3] |
|                                        | 10                                  | 0.4                    | 400           | 1,600                                       | [R4] |
|                                        | 2.9                                 | 0.2                    | 5,000         | 2,900                                       | [R5] |
| <b>this work</b>                       | <b>2.12</b>                         | <b>0.4</b>             | <b>10,000</b> | <b>8,480</b>                                |      |

The total usable energy was derived by multiplying its energy density by lifetime, which is the number of cycles upon which each device lost 20% of its initial energy, or the highest reported lifetime.

- R3. Y. Liu, H. Zhou, W. Zhou, S. Meng, C. Qi, Z. Liu, and T. Kong, *Adv. Energy Mater.*, 2021, **11**, 2101329.
- R4. W.-H. Khoh, B.-H. Wee, and J.-D. Hong, *Colloids Surf. A: Physicochem. Eng. Asp.*, 2019, **581**, 123815.
- R5. P. Chang, H. Mei, Y. Tan, Y. Zhao, W. Huang, and L. Cheng, *J. Mater. Chem. A*, 2020, **8**, 13646-13658.
